# Supplementary material for: De Novo Design of Anti-COVID Drugs Using Machine Learning-Based Equivariant Diffusion Model Targeting the Spike Protein
Source: MDPI journal article supplement (doi:10.3390/cimb45050271), 2023-05-12
Supplement: s1 [file s1]

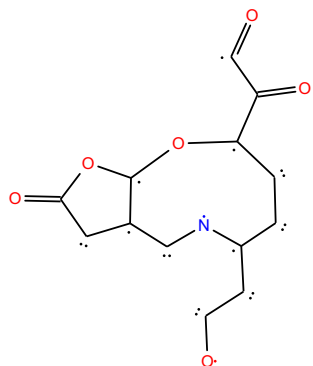

entry name spike\_inpaint\_ca\_mol.1

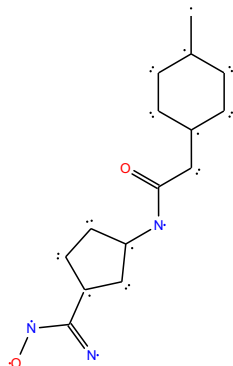

entry name spike\_inpaint\_ca\_mol.2

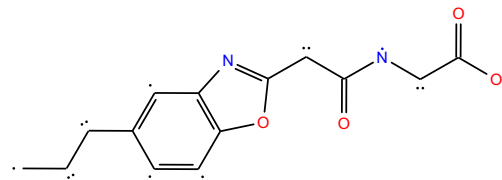

entry name spike\_inpaint\_ca\_mol.3

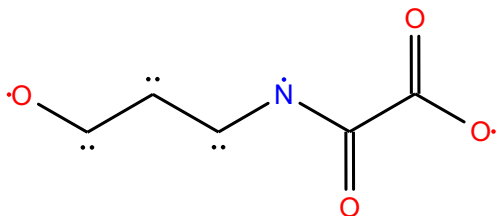

entry name spike\_inpaint\_ca\_mol.4

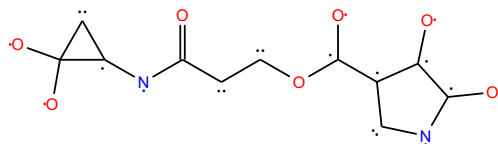

entry name spike\_inpaint\_ca\_mol.5

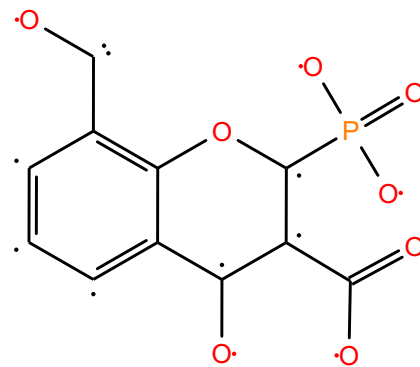

entry name spike\_inpaint\_ca\_mol.6

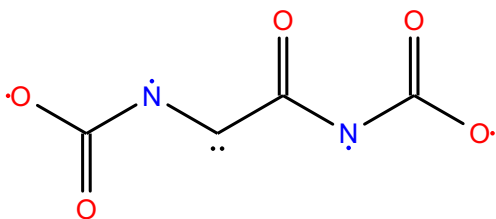

entry name spike\_inpaint\_ca\_mol.7

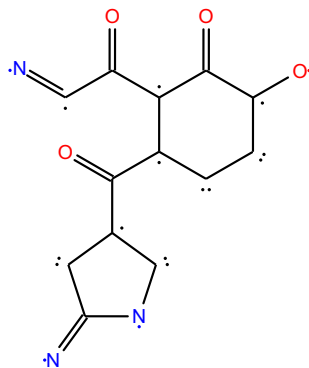

entry name spike\_inpaint\_ca\_mol.8

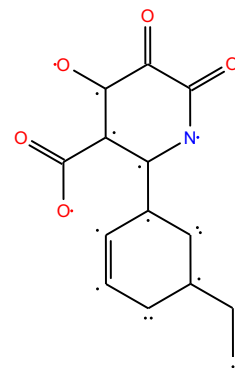

entry name spike\_inpaint\_ca\_mol.9

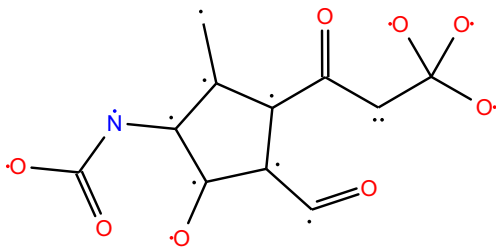

entry name spike\_inpaint\_ca\_mol.10

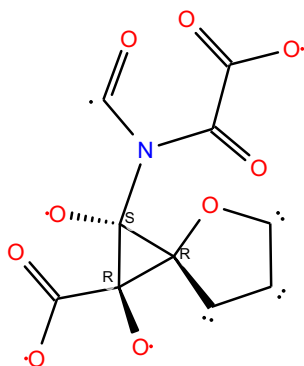

entry name spike\_inpaint\_ca\_mol.11

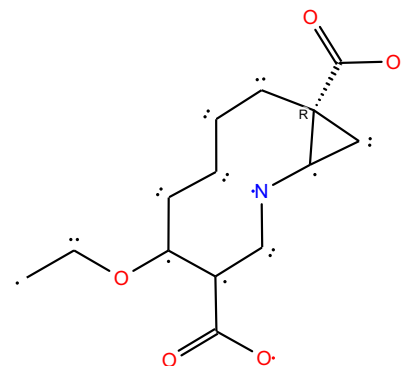

entry name spike\_inpaint\_ca\_mol.12

|                                         |                                         |                                         |
|-----------------------------------------|-----------------------------------------|-----------------------------------------|
|                                         |                                         |                                         |
| entry name      spike_inpaint_ca_mol.13 | entry name      spike_inpaint_ca_mol.14 | entry name      spike_inpaint_ca_mol.15 |
|                                         |                                         |                                         |
| entry name      spike_inpaint_ca_mol.16 | entry name      spike_inpaint_ca_mol.17 | entry name      spike_inpaint_ca_mol.18 |
|                                         |                                         |                                         |
| entry name      spike_inpaint_ca_mol.19 | entry name      spike_inpaint_ca_mol.20 | entry name      spike_inpaint_ca_mol.21 |
|                                         |                                         |                                         |
| entry name      spike_inpaint_ca_mol.22 | entry name      spike_inpaint_ca_mol.23 | entry name      spike_inpaint_ca_mol.24 |

|                                                                                    |                                                                                     |                                                                                       |
|------------------------------------------------------------------------------------|-------------------------------------------------------------------------------------|---------------------------------------------------------------------------------------|
| 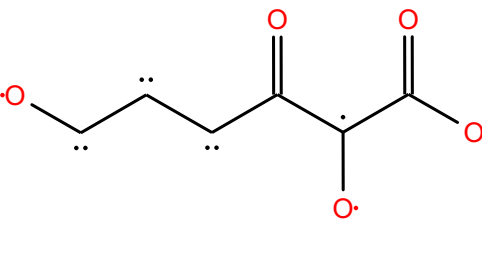   |    |     |
| entry name      spike_inpaint_ca_mol.25                                            | entry name      spike_inpaint_ca_mol.26                                             | entry name      spike_inpaint_ca_mol.27                                               |
|    |   |    |
| entry name      spike_inpaint_ca_mol.28                                            | entry name      spike_inpaint_ca_mol.29                                             | entry name      spike_inpaint_ca_mol.30                                               |
|   |  |  |
| entry name      spike_inpaint_ca_mol.31                                            | entry name      spike_inpaint_ca_mol.32                                             | entry name      spike_inpaint_ca_mol.33                                               |
|  |  |  |
| entry name      spike_inpaint_ca_mol.34                                            | entry name      spike_inpaint_ca_mol.35                                             | entry name      spike_inpaint_ca_mol.36                                               |

|                                                                                    |                                                                                      |                                                                                       |
|------------------------------------------------------------------------------------|--------------------------------------------------------------------------------------|---------------------------------------------------------------------------------------|
| 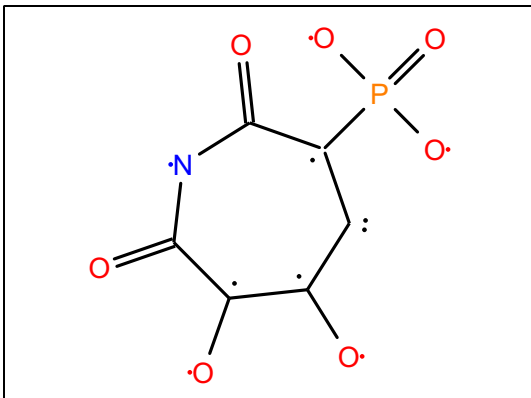    |     |     |
| entry name spike_inpaint_ca_mol.37                                                 | entry name spike_inpaint_ca_mol.38                                                   | entry name spike_inpaint_ca_mol.39                                                    |
|    |    |    |
| entry name spike_inpaint_ca_mol.40                                                 | entry name spike_inpaint_ca_mol.41                                                   | entry name spike_inpaint_ca_mol.42                                                    |
|   |   |   |
| entry name spike_inpaint_ca_mol.43                                                 | entry name spike_inpaint_ca_mol.44                                                   | entry name spike_inpaint_ca_mol.45                                                    |
|  |  |  |
| entry name spike_inpaint_ca_mol.46                                                 | entry name spike_inpaint_ca_mol.47                                                   | entry name spike_inpaint_ca_mol.48                                                    |

|                                                                                    |                                                                                      |                                                                                       |
|------------------------------------------------------------------------------------|--------------------------------------------------------------------------------------|---------------------------------------------------------------------------------------|
| 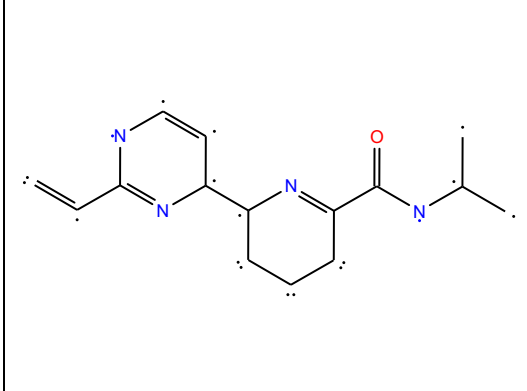    |     |     |
| entry name      spike_inpaint_ca_mol.45                                            | entry name      spike_inpaint_ca_mol.50                                              | entry name      spike_inpaint_ca_mol.54                                               |
|    |    |    |
| entry name      spike_inpaint_ca_mol.52                                            | entry name      spike_inpaint_ca_mol.53                                              | entry name      spike_inpaint_ca_mol.54                                               |
|   |   |   |
| entry name      spike_inpaint_ca_mol.55                                            | entry name      spike_inpaint_ca_mol.56                                              | entry name      spike_inpaint_ca_mol.57                                               |
|  |  |  |
| entry name      spike_inpaint_ca_mol.58                                            | entry name      spike_inpaint_ca_mol.59                                              | entry name      spike_inpaint_ca_mol.60                                               |

|                                                                                    |                                                                                      |                                                                                       |
|------------------------------------------------------------------------------------|--------------------------------------------------------------------------------------|---------------------------------------------------------------------------------------|
| 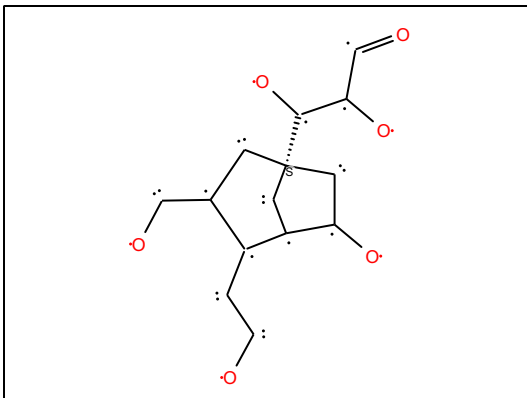    |     |     |
| entry name spike_inpaint_ca_mol.64                                                 | entry name spike_inpaint_ca_mol.62                                                   | entry name spike_inpaint_ca_mol.63                                                    |
|    |    |    |
| entry name spike_inpaint_ca_mol.64                                                 | entry name spike_inpaint_ca_mol.65                                                   | entry name spike_inpaint_ca_mol.66                                                    |
|   |   |   |
| entry name spike_inpaint_ca_mol.67                                                 | entry name spike_inpaint_ca_mol.68                                                   | entry name spike_inpaint_ca_mol.69                                                    |
|  |  |  |
| entry name spike_inpaint_ca_mol.70                                                 | entry name spike_inpaint_ca_mol.71                                                   | entry name spike_inpaint_ca_mol.72                                                    |

|                                                                                    |                                                                                      |                                                                                       |
|------------------------------------------------------------------------------------|--------------------------------------------------------------------------------------|---------------------------------------------------------------------------------------|
| 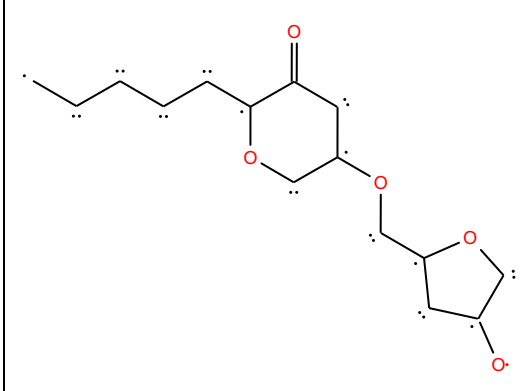    |     |     |
| entry name spike_inpaint_ca_mol.73                                                 | entry name spike_inpaint_ca_mol.74                                                   | entry name spike_inpaint_ca_mol.75                                                    |
|    |    |    |
| entry name spike_inpaint_ca_mol.76                                                 | entry name spike_inpaint_ca_mol.77                                                   | entry name spike_inpaint_ca_mol.78                                                    |
|   |   |   |
| entry name spike_inpaint_ca_mol.79                                                 | entry name spike_inpaint_ca_mol.80                                                   | entry name spike_inpaint_ca_mol.81                                                    |
|  |  |  |
| entry name spike_inpaint_ca_mol.82                                                 | entry name spike_inpaint_ca_mol.83                                                   | entry name spike_inpaint_ca_mol.84                                                    |

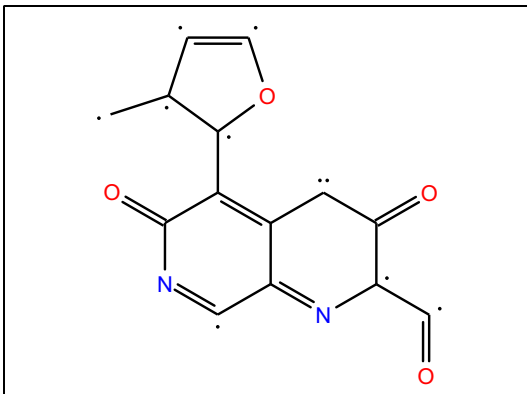

entry name spike\_inpaint\_ca\_mol.85

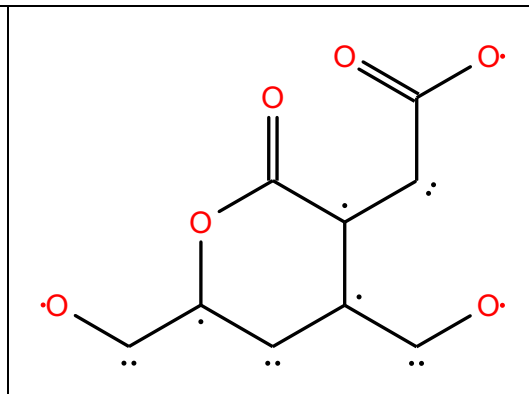

entry name spike\_inpaint\_ca\_mol.86

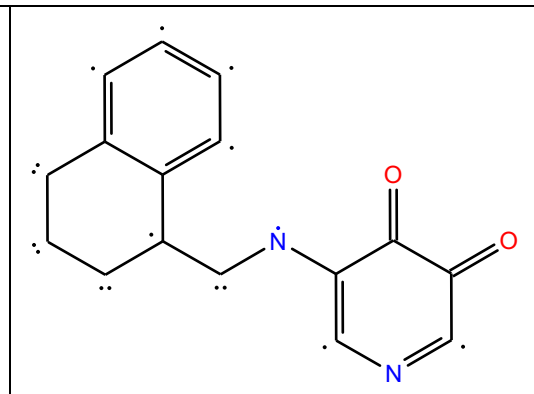

entry name spike\_inpaint\_ca\_mol.87

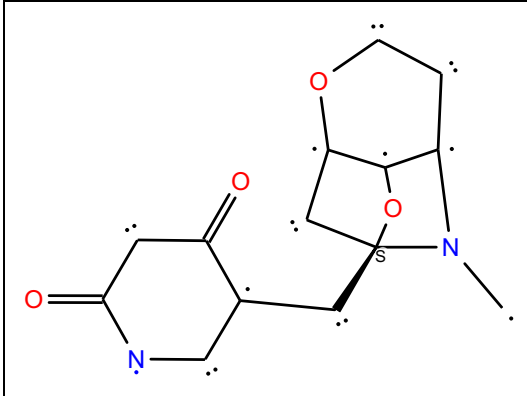

entry name spike\_inpaint\_ca\_mol.88

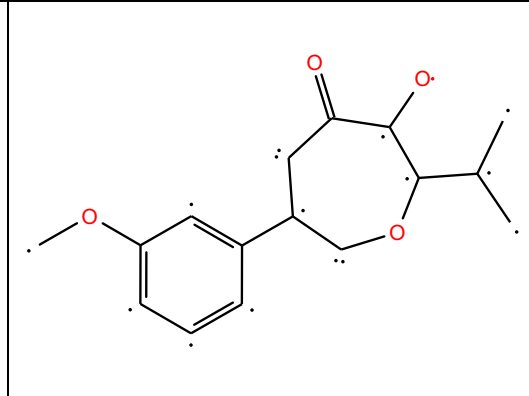

entry name spike\_inpaint\_ca\_mol.89

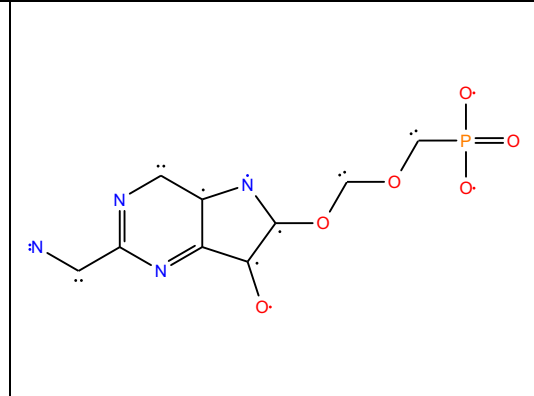

entry name spike\_inpaint\_ca\_mol.90

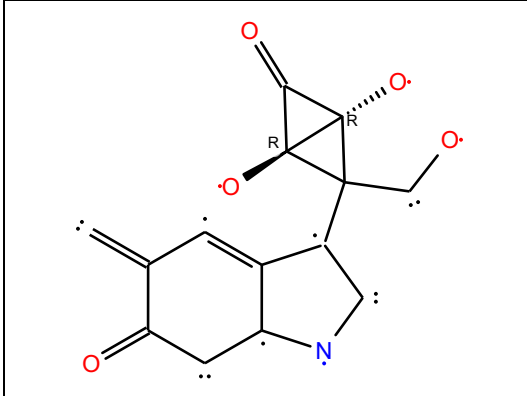

entry name spike\_inpaint\_ca\_mol.91

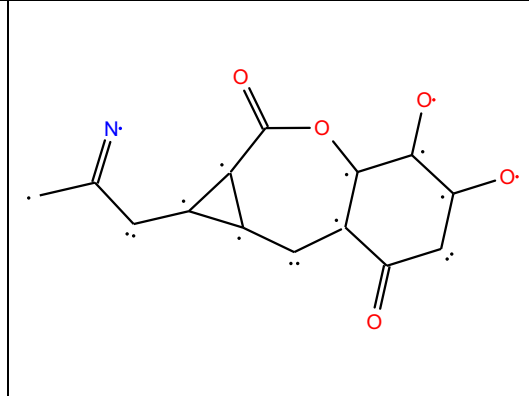

entry name spike\_inpaint\_ca\_mol.92

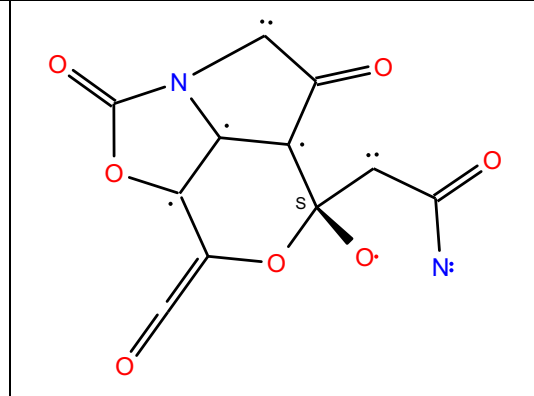

entry name spike\_inpaint\_ca\_mol.93

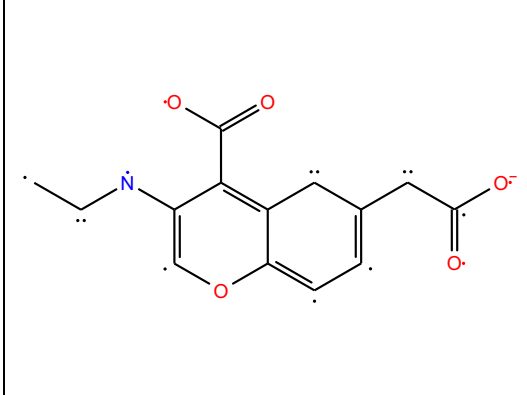

entry name spike\_inpaint\_ca\_mol.94

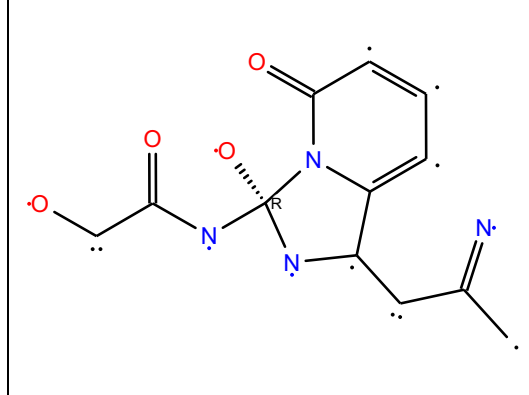

entry name spike\_inpaint\_ca\_mol.95

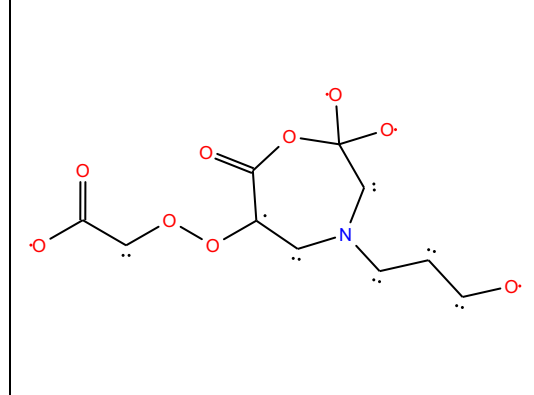

entry name spike\_inpaint\_ca\_mol.96



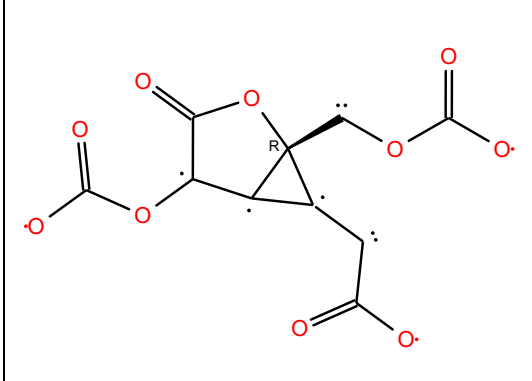

entry name spike\_inpaint\_ca\_mol.97

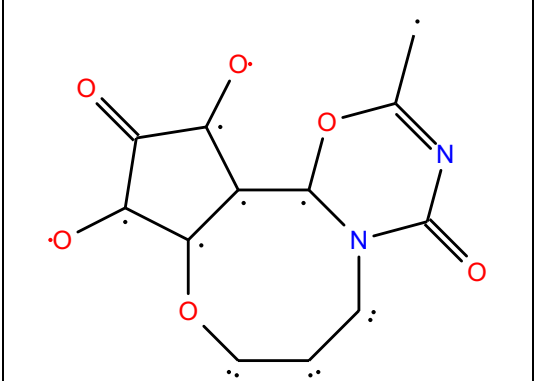

entry name spike\_inpaint\_ca\_mol.98
