# Supplementary material for: De Novo Design of Anti-COVID Drugs Using Machine Learning-Based Equivariant Diffusion Model Targeting the Spike Protein
Source: MDPI journal article supplement (doi:10.3390/cimb45050271), 2023-05-12
Supplement: s1 [file s1]

|                                                                                    |                                                                                      |                                                                                       |
|------------------------------------------------------------------------------------|--------------------------------------------------------------------------------------|---------------------------------------------------------------------------------------|
|     |     |     |
| entry name      spike_fullatom_new2_m                                              | entry name      spike_fullatom_new2_m                                                | entry name      spike_fullatom_new2_m                                                 |
|    |    |    |
| entry name      spike_fullatom_new2_m                                              | entry name      spike_fullatom_new2_m                                                | entry name      spike_fullatom_new2_m                                                 |
|   |   |   |
| entry name      spike_fullatom_new2_m                                              | entry name      spike_fullatom_new2_m                                                | entry name      spike_fullatom_new2_m                                                 |
|  |  |  |
| entry name      spike_fullatom_new2_m                                              | entry name      spike_fullatom_new2_m                                                | entry name      spike_fullatom_new2_m                                                 |

|                                                                                    |                                                                                     |                                                                                       |
|------------------------------------------------------------------------------------|-------------------------------------------------------------------------------------|---------------------------------------------------------------------------------------|
| 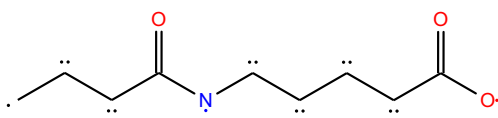   |   |    |
| entry name spike_fullatom_new2_m                                                   | entry name spike_fullatom_new2_m                                                    | entry name spike_fullatom_new2_m                                                      |
|    |   |    |
| entry name spike_fullatom_new2_m                                                   | entry name spike_fullatom_new2_m                                                    | entry name spike_fullatom_new2_m                                                      |
|   |   |   |
| entry name spike_fullatom_new2_m                                                   | entry name spike_fullatom_new2_m                                                    | entry name spike_fullatom_new2_m                                                      |
|  |  |  |
| entry name spike_fullatom_new2_m                                                   | entry name spike_fullatom_new2_m                                                    | entry name spike_fullatom_new2_m                                                      |

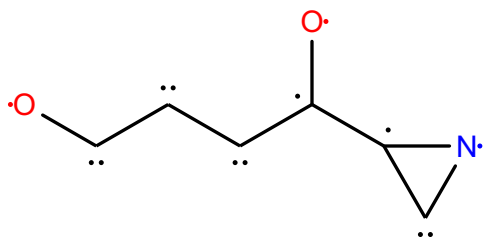

entry name spike\_fullatom\_new2\_m

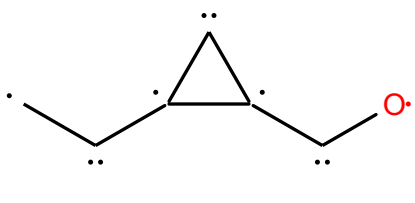

entry name spike\_fullatom\_new2\_m

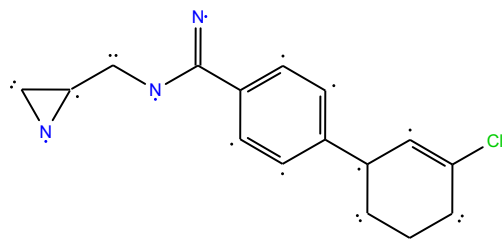

entry name spike\_fullatom\_new2\_m

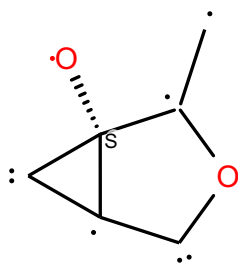

entry name spike\_fullatom\_new2\_m

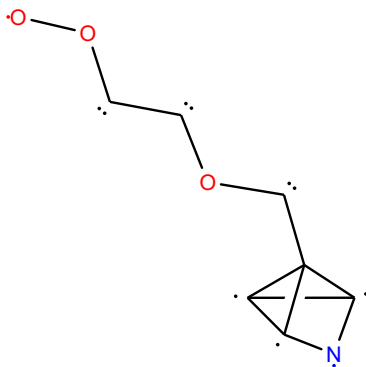

entry name spike\_fullatom\_new2\_m

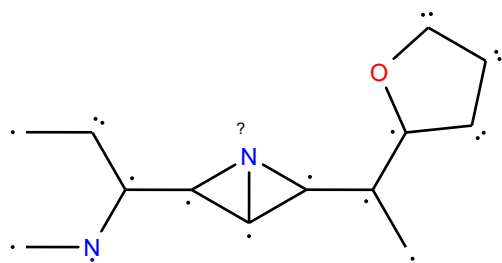

entry name spike\_fullatom\_new2\_m

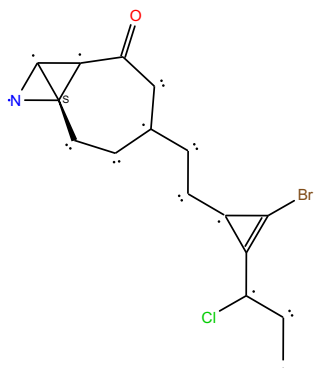

entry name spike\_fullatom\_new2\_m

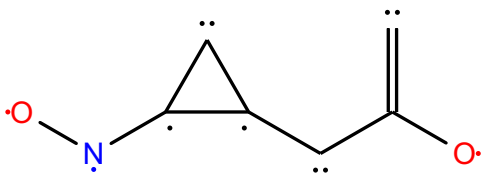

entry name spike\_fullatom\_new2\_m

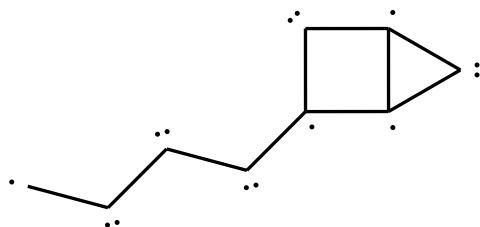

entry name spike\_fullatom\_new2\_m

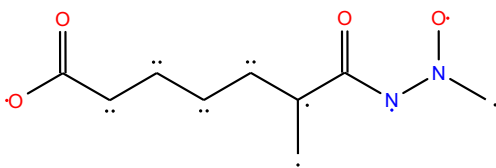

entry name spike\_fullatom\_new2\_m

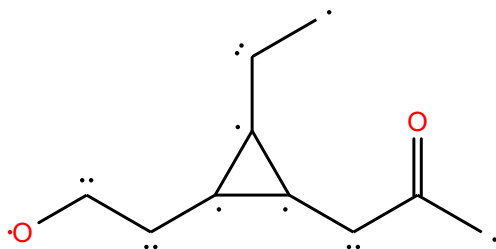

entry name spike\_fullatom\_new2\_m

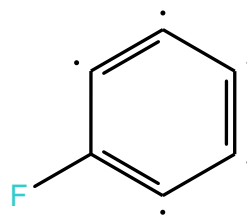

entry name spike\_fullatom\_new2\_m

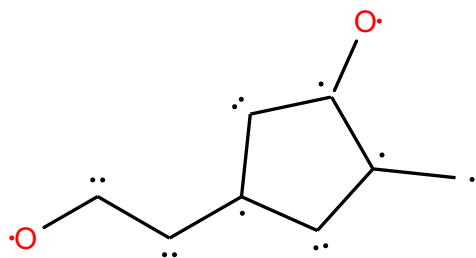

entry name spike\_fullatom\_new2\_m

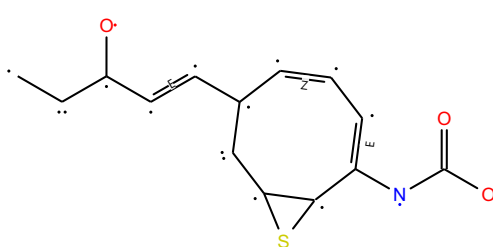

entry name spike\_fullatom\_new2\_m

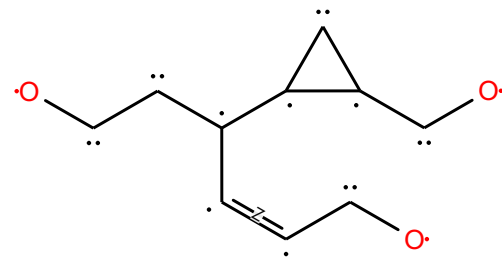

entry name spike\_fullatom\_new2\_m

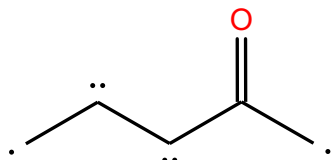

entry name spike\_fullatom\_new2\_m

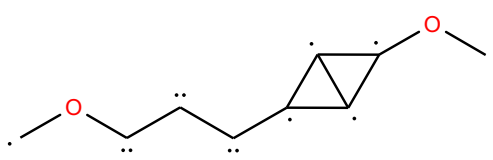

entry name spike\_fullatom\_new2\_m

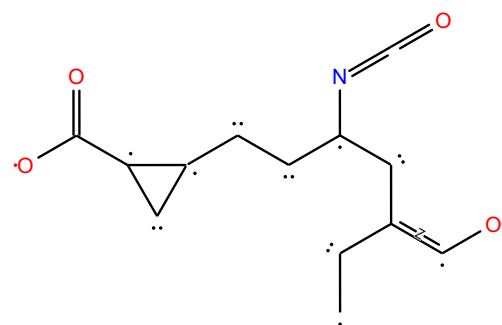

entry name spike\_fullatom\_new2\_m

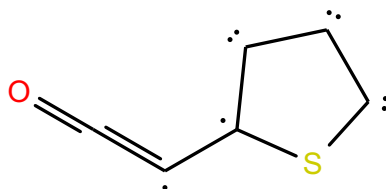

entry name spike\_fullatom\_new2\_m

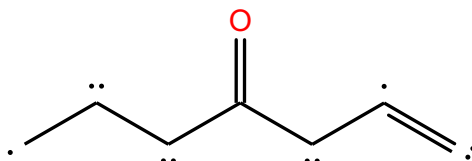

entry name spike\_fullatom\_new2\_m

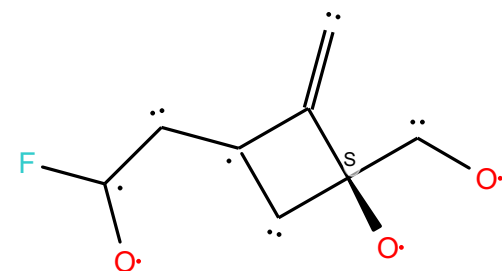

entry name spike\_fullatom\_new2\_m

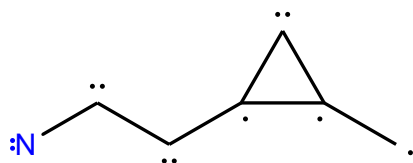

entry name spike\_fullatom\_new2\_m

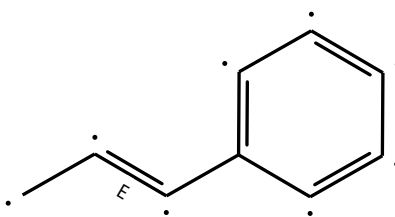

entry name spike\_fullatom\_new2\_m

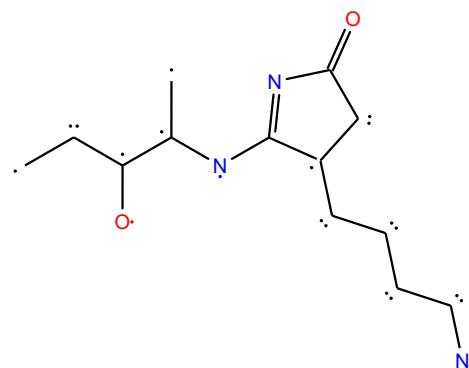

entry name spike\_fullatom\_new2\_m

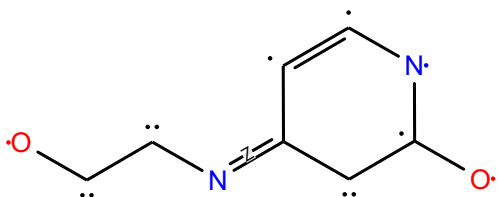

entry name spike\_fullatom\_new2\_m

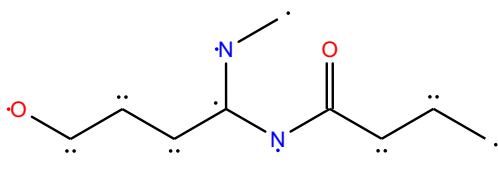

entry name spike\_fullatom\_new2\_m

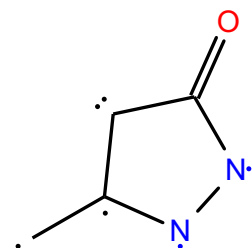

entry name spike\_fullatom\_new2\_m

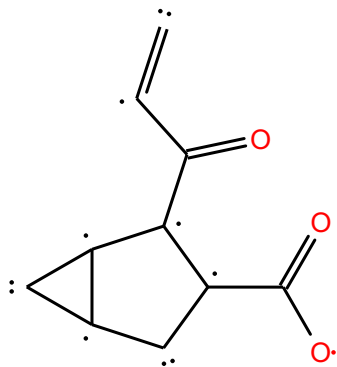

entry name spike\_fullatom\_new2\_m

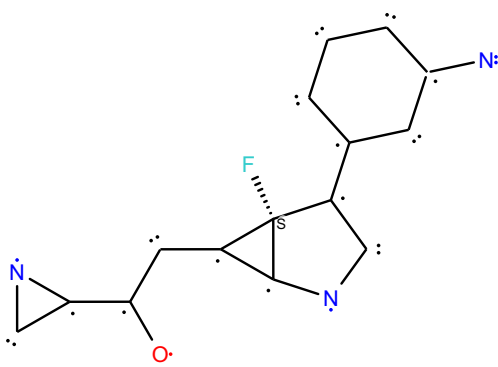

entry name spike\_fullatom\_new2\_m

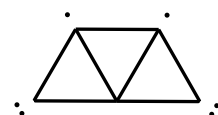

entry name spike\_fullatom\_new2\_m

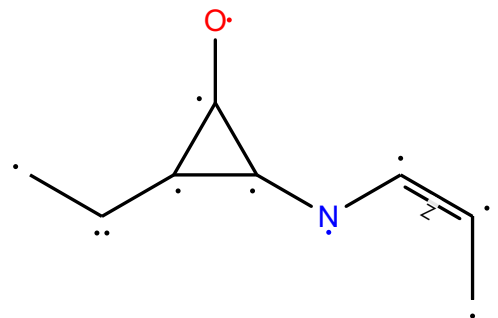

entry name spike\_fullatom\_new2\_m

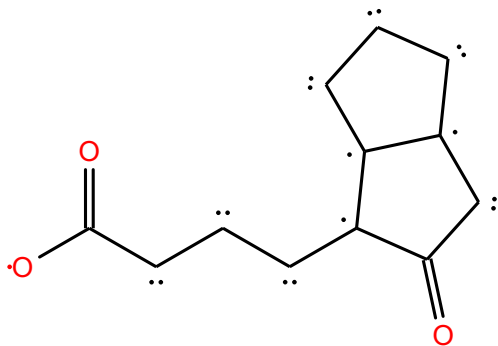

entry name spike\_fullatom\_new2\_m

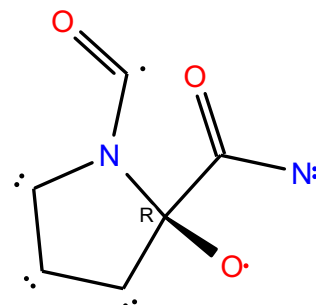

entry name spike\_fullatom\_new2\_m

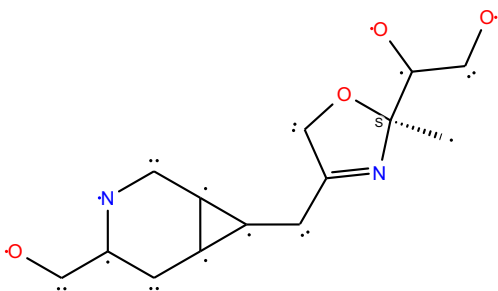

entry name spike\_fullatom\_new2\_m

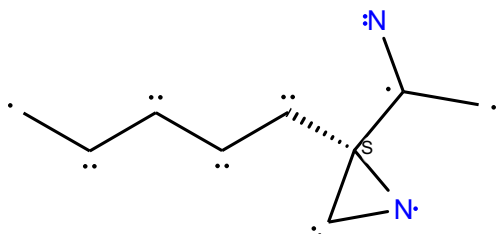

entry name spike\_fullatom\_new2\_m

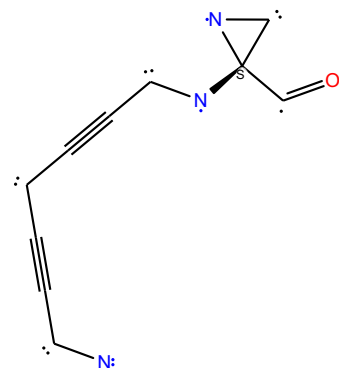

entry name spike\_fullatom\_new2\_m

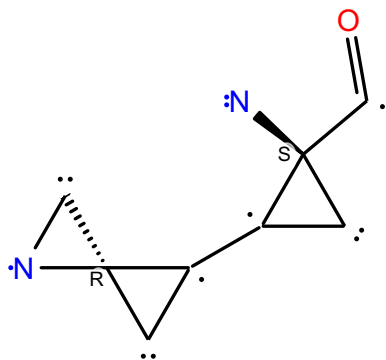

entry name spike\_fullatom\_new2\_m

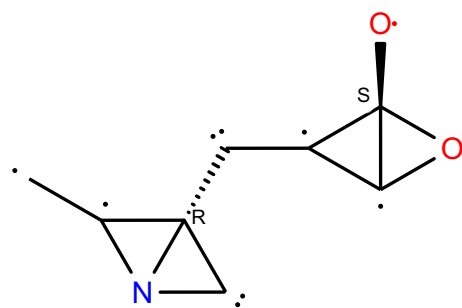

entry name spike\_fullatom\_new2\_m

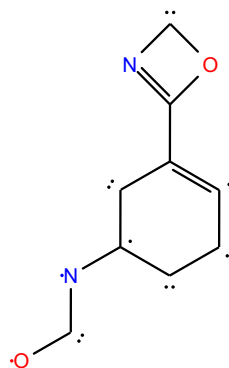

entry name spike\_fullatom\_new2\_m

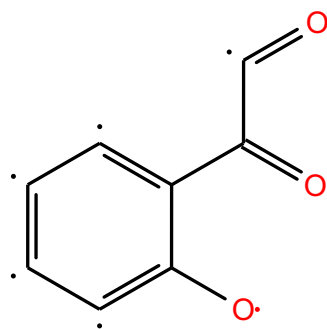

entry name spike\_fullatom\_new2\_m

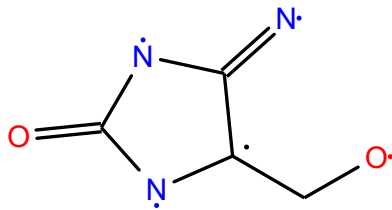

entry name spike\_fullatom\_new2\_m

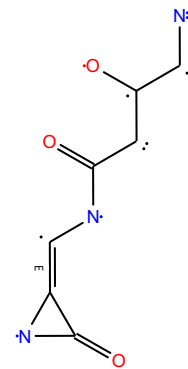

entry name spike\_fullatom\_new2\_m

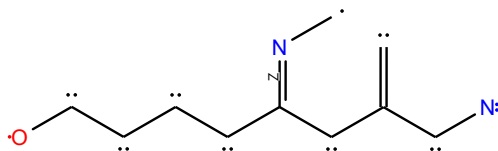

entry name spike\_fullatom\_new2\_m

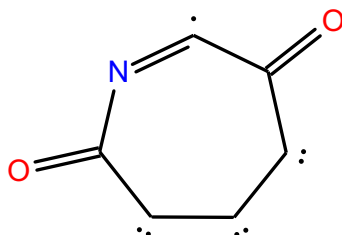

entry name spike\_fullatom\_new2\_m

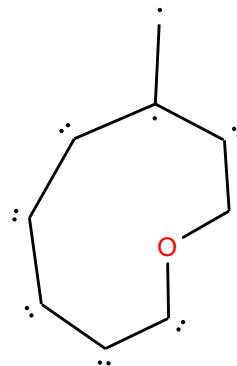

entry name spike\_fullatom\_new2\_m

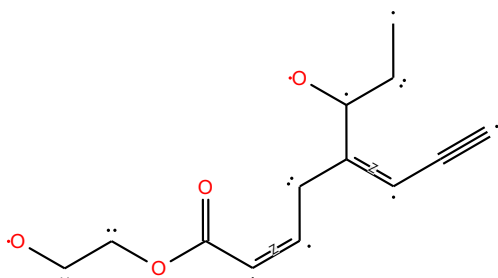

entry name spike\_fullatom\_new2\_m

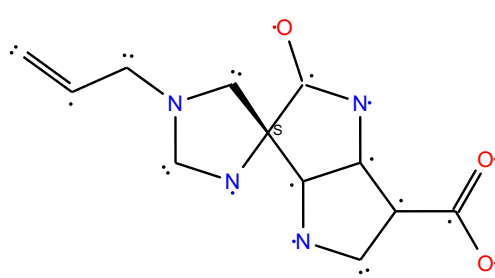

entry name spike\_fullatom\_new2\_m

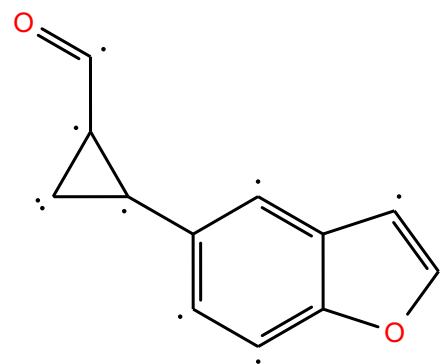

entry name spike\_fullatom\_new2\_m

|                                                                                    |                                                                                      |                                                                                       |
|------------------------------------------------------------------------------------|--------------------------------------------------------------------------------------|---------------------------------------------------------------------------------------|
| 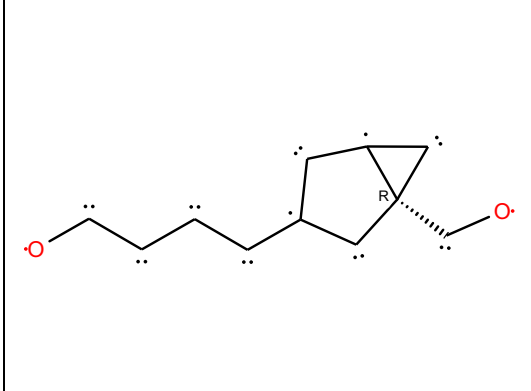    |     |     |
| entry name      spike_fullatom_new2_m                                              | entry name      spike_fullatom_new2_m                                                | entry name      spike_fullatom_new2_m                                                 |
|    |    |    |
| entry name      spike_fullatom_new2_m                                              | entry name      spike_fullatom_new2_m                                                | entry name      spike_fullatom_new2_m                                                 |
|   |   |   |
| entry name      spike_fullatom_new2_m                                              | entry name      spike_fullatom_new2_m                                                | entry name      spike_fullatom_new2_m                                                 |
|  |  |  |
| entry name      spike_fullatom_new2_m                                              | entry name      spike_fullatom_new2_m                                                | entry name      spike_fullatom_new2_m                                                 |

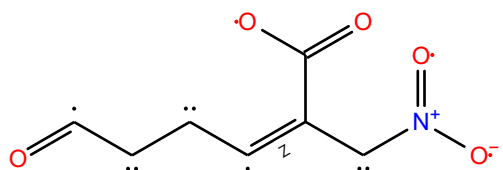

entry name spike\_fullatom\_new2\_m

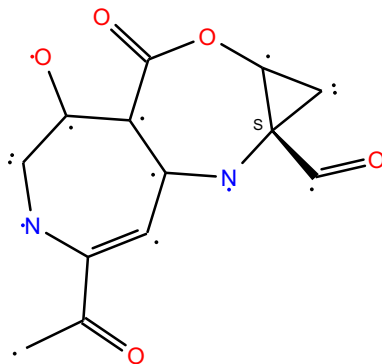

entry name spike\_fullatom\_new2\_m

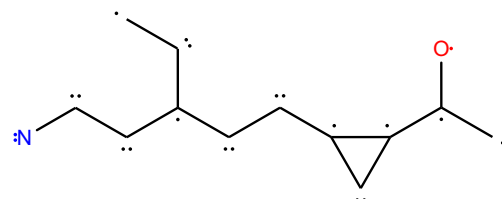

entry name spike\_fullatom\_new2\_m

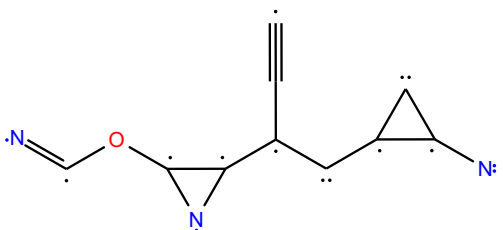

entry name spike\_fullatom\_new2\_m

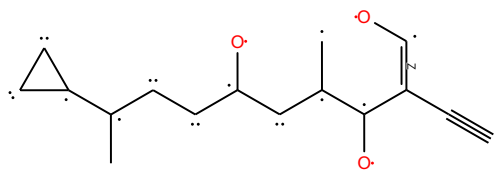

entry name spike\_fullatom\_new2\_m

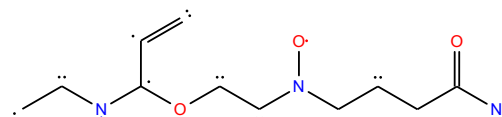

entry name spike\_fullatom\_new2\_m

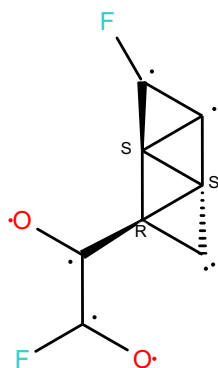

entry name spike\_fullatom\_new2\_m

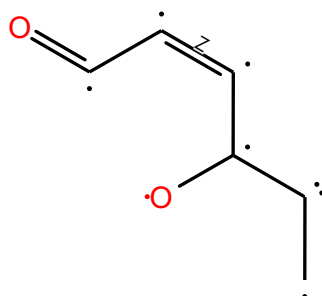

entry name spike\_fullatom\_new2\_m

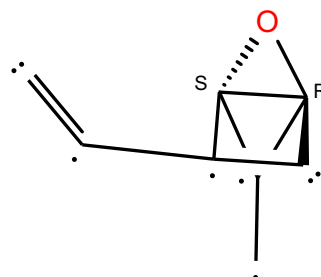

entry name spike\_fullatom\_new2\_m

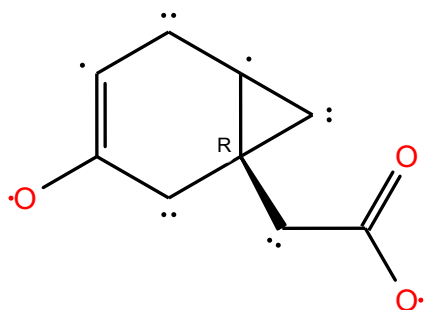

entry name spike\_fullatom\_new2\_m

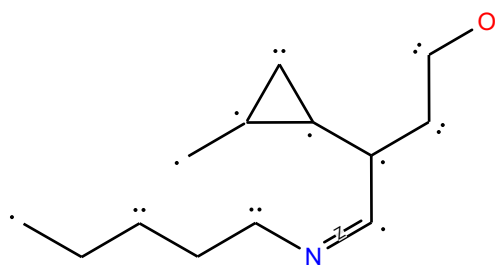

entry name spike\_fullatom\_new2\_m

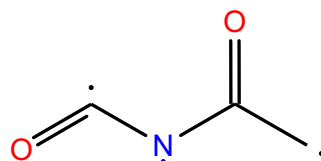

entry name spike\_fullatom\_new2\_m



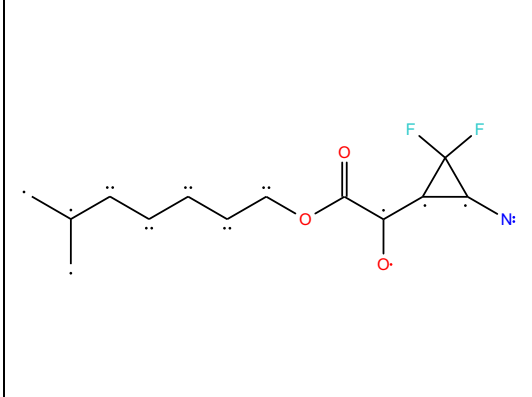

entry name spike\_fullatom\_new2\_m

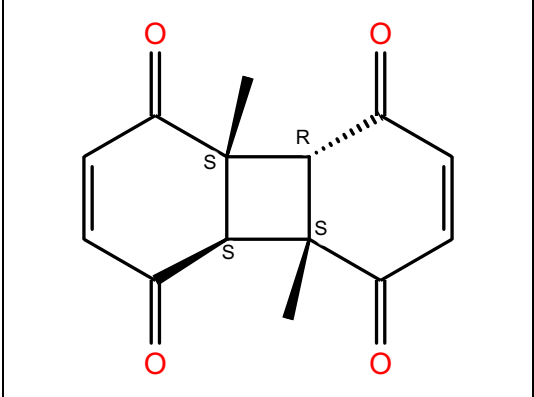

entry name spike\_fullatom\_new2\_m
